# Supplementary material for: End-to-End Lip-Reading Open Cloud-Based Speech Architecture
Source: MDPI journal article supplement (doi:10.3390/s22082938), 2022-04-12
Supplement: s1 [file s1]

## Article

# Supplementary materials

## End-to-End Lip-Reading Open Cloud-Based Speech Architecture

Sanghun Jeon and Mun Sang Kim \*

**Citation:** Jeon, S.; Kim, M.S. End-to-End Lip-Reading Open Cloud-Based Speech Architecture. *Sensors* **2022**, *22*, 2938. <https://doi.org/10.3390/2938>

Center for Healthcare Robotics, Gwangju Institute of Science and Technology (GIST), School of Integrated Technology, Gwangju 61005, Korea; jeon7887@gist.ac.kr

\* Correspondence: munsang@gist.ac.kr; Tel.: +82-10-9126-4628

Academic Editors: Bruce Denby, Tamás Gábor Csapó, Michael Wand and Nikolaos Doulamis

Received: 17 February 2022

Accepted: 8 April 2022

Published: 12 April 2022

**Publisher's Note:** MDPI stays neutral with regard to jurisdictional claims in published maps and institutional affiliations.

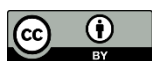

**Copyright:** © 2022 by the authors. Submitted for possible open access publication under the terms and conditions of the Creative Commons Attribution (CC BY) license (<https://creativecommons.org/licenses/by/4.0/>).

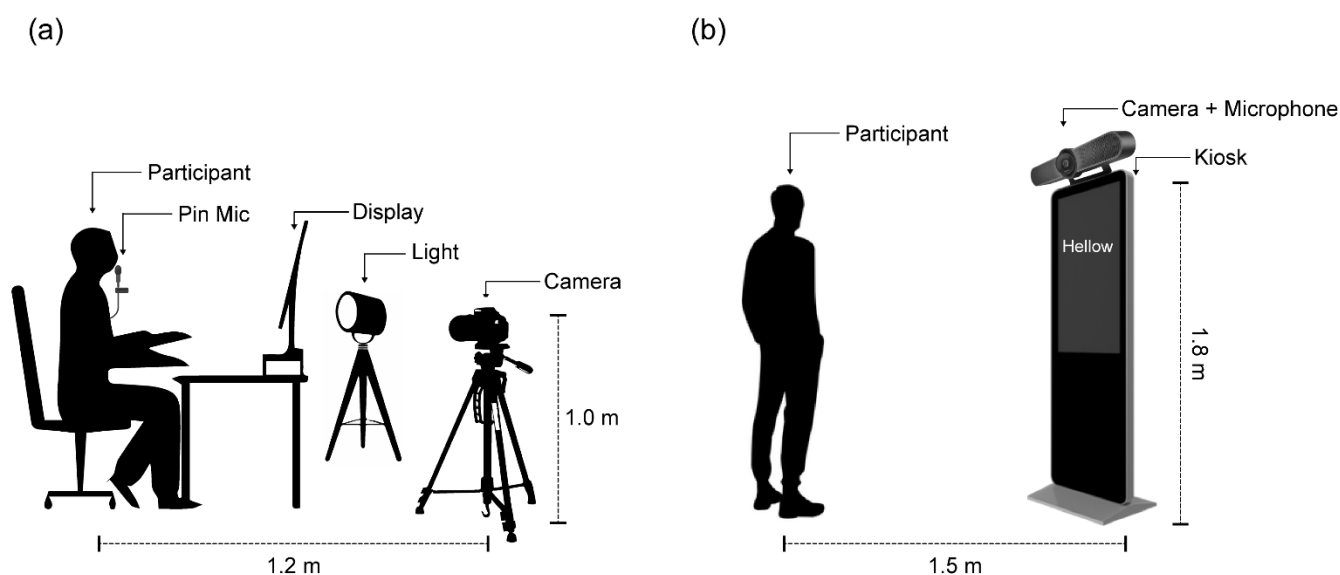

**Supplementary Figure S1.** (a) Data recording environment for audiovisual data and (b) evaluation of auditory-visual speech recognition system.

**Supplementary Table S1.** Hyperparameters of the proposed architecture.

| Layers                  | Size / Strid / Pad                                             |               | Visual                             | Audio        | Dimension Order                |
|-------------------------|----------------------------------------------------------------|---------------|------------------------------------|--------------|--------------------------------|
|                         |                                                                |               | Output Size                        |              |                                |
| 3D Conv                 | $[3 \times 5 \times 5] / (1, 2, 2) / (1, 2, 2)$                |               | $60 \times 50 \times 25 \times 64$ | 1500         | $T \times C \times H \times W$ |
| 3D Max Pooling          | $[1 \times 2 \times 2] / (1, 2, 2)$                            |               | $60 \times 50 \times 13 \times 64$ |              | $T \times C \times H \times W$ |
| 3D Dense Block (1)      | $[3 \times 1 \times 1]$ 3D Conv                                | $(\times 6)$  | $60 \times 25 \times 13 \times 96$ |              | $T \times C \times H \times W$ |
|                         | $[3 \times 3 \times 3]$ 3D Conv                                |               |                                    |              |                                |
| 3D Transition Block (1) | $[3 \times 1 \times 1]$ 3D Conv                                |               | $60 \times 12 \times 6 \times 6$   |              | $T \times C \times H \times W$ |
|                         | $[1 \times 2 \times 2]$ average pool / $(1 \times 2 \times 2)$ |               |                                    |              |                                |
| 3D Dense Block (2)      | $[3 \times 1 \times 1]$ 3D Conv                                | $(\times 12)$ | $60 \times 12 \times 6 \times 38$  |              | $T \times C \times H \times W$ |
|                         | $[3 \times 3 \times 3]$ 3D Conv                                |               |                                    |              |                                |
| 3D Transition Block (2) | $[3 \times 1 \times 1]$ 3D Conv                                |               | $60 \times 6 \times 3 \times 3$    |              | $T \times C \times H \times W$ |
|                         | $[1 \times 2 \times 2]$ average pool / $(1 \times 2 \times 2)$ |               |                                    |              |                                |
| 3D Dense Block (3)      | $[3 \times 1 \times 1]$ 3D Conv                                | $(\times 24)$ | $60 \times 12 \times 6 \times 38$  |              | $T \times C \times H \times W$ |
|                         | $[3 \times 3 \times 3]$ 3D Conv                                |               |                                    |              |                                |
| 3D Transition Block (3) | $[3 \times 1 \times 1]$ 3D Conv                                |               | $60 \times 3 \times 1 \times 1$    |              | $T \times C \times H \times W$ |
|                         | $[1 \times 2 \times 2]$ average pool / $(1 \times 2 \times 2)$ |               |                                    |              |                                |
| 3D Dense Block (4)      | $[3 \times 1 \times 1]$ 3D Conv                                | $(\times 16)$ | $60 \times 3 \times 1 \times 33$   |              | $T \times C \times H \times W$ |
|                         | $[3 \times 3 \times 3]$ 3D Conv                                |               |                                    |              |                                |
| Multilayer 3D CNN (1)   | $[3 \times 5 \times 5] / (1, 2, 2) / (1, 2, 2)$                |               | $60 \times 3 \times 1 \times 64$   |              | $T \times C \times H \times W$ |
| Multilayer 3D CNN (2)   | $[3 \times 5 \times 5] / (1, 2, 2) / (1, 2, 2)$                |               | $60 \times 3 \times 1 \times 64$   |              | $T \times C \times H \times W$ |
| Multilayer 3D CNN (3)   | $[3 \times 5 \times 5] / (1, 2, 2) / (1, 2, 2)$                |               | $60 \times 3 \times 1 \times 64$   |              | $T \times C \times H \times W$ |
| Bi-GRU (1)              | 256                                                            |               | $60 \times 512$                    |              | $T \times F$                   |
| Bi-GRU (2)              | 256                                                            |               | $60 \times 512$                    |              | $T \times F$                   |
| Concatenation           |                                                                |               | $60 \times 2012$                   | $T \times F$ |                                |
| Linear                  | 27 + blank                                                     |               | $60 \times 2012$                   | $T \times F$ |                                |
| Softmax                 |                                                                |               | $60 \times 28$                     | $T \times V$ |                                |

Supplementary Table S2. (a) Google Speech Commands Dataset v2 and (b) Collected Speech Commands Dataset.

| (a) Google Speech Commands Dataset v2 |        |       |        |         |
|---------------------------------------|--------|-------|--------|---------|
| backward                              | bed    | bird  | cat    | dog     |
| down                                  | eight  | five  | follow | forward |
| four                                  | go     | happy | house  | learn   |
| left                                  | marvin | nine  | no     | off     |
| on                                    | one    | right | seven  | sheila  |
| six                                   | stop   | three | tree   | two     |
| up                                    | visual | wow   | yes    | zero    |
| (b) Collected Speech Commands Dataset |        |       |        |         |
| Up                                    | down   | play  | stop   | Left    |
| right                                 | back   | next  | on     | Off     |
| pause                                 | start  | turn  | center | Under   |

| internet | music | weather | camera | Time |
|----------|-------|---------|--------|------|
|----------|-------|---------|--------|------|

**Supplementary Table S3.** Noise database structure: Categories and recordings conducted in each category.

|     | Category       | Place     | Environment                                                                            |
|-----|----------------|-----------|----------------------------------------------------------------------------------------|
| (a) | Nature         | Park      | Well-visited city park                                                                 |
| (b) | Office         | Hallway   | Hallway inside an office building, with individuals and groups passing by occasionally |
| (c) | Public         | Cafeteria | Busy office cafeteria                                                                  |
| (d) |                | Station   | Main transfer area of a busy subway station                                            |
| (e) | Street         | Cafe      | Terrace of a cafe at a public square                                                   |
| (f) |                | Square    | Public town square with many tourists                                                  |
| (g) | Transportation | Car       | Private passenger vehicle                                                              |
| (h) | Domestic       | Living    | Inside a living room                                                                   |

**Supplementary Table S4.** Performance evaluation of speech recognition systems on Google Speech Commands Dataset V2.

| Class    | Number of files | Google Cloud |          | MS-Azure |          | Naver Clova |          | Amazon Transcribe |          |
|----------|-----------------|--------------|----------|----------|----------|-------------|----------|-------------------|----------|
|          |                 | Correct      | Accuracy | Correct  | Accuracy | Correct     | Accuracy | Correct           | Accuracy |
| backward | 1,664           | 586          | 35.22%   | 1,286    | 77.28%   | 125         | 7.51%    | 946               | 56.85%   |
| bed      | 2,014           | 891          | 44.24%   | 1,390    | 69.02%   | 234         | 11.62%   | 914               | 45.38%   |
| bird     | 2,064           | 1,137        | 55.09%   | 1,757    | 85.13%   | 0           | 0.00%    | 1609              | 77.96%   |
| cat      | 2,031           | 1,147        | 56.47%   | 1,795    | 88.38%   | 320         | 15.76%   | 1584              | 77.99%   |
| dog      | 2,128           | 1,627        | 76.46%   | 1,853    | 87.08%   | 359         | 16.87%   | 1774              | 83.36%   |
| down     | 3,917           | 2,523        | 64.41%   | 3,461    | 88.36%   | 714         | 18.23%   | 3251              | 83.00%   |
| eight    | 3,787           | 2,193        | 57.91%   | 3,208    | 84.71%   | 1,163       | 30.71%   | 3021              | 79.77%   |
| five     | 4,052           | 2,475        | 61.08%   | 3,505    | 86.50%   | 1,547       | 38.18%   | 3516              | 86.77%   |
| follow   | 1,579           | 652          | 41.29%   | 1,329    | 84.17%   | 196         | 12.41%   | 1224              | 77.52%   |
| forward  | 1,557           | 619          | 39.76%   | 1,296    | 83.24%   | 103         | 6.62%    | 1164              | 74.76%   |
| four     | 3,728           | 2,213        | 59.36%   | 3,320    | 89.06%   | 1,446       | 38.79%   | 2713              | 72.77%   |
| go       | 3,880           | 2,372        | 61.13%   | 3,504    | 90.31%   | 705         | 18.17%   | 3261              | 84.05%   |
| happy    | 2,054           | 1,705        | 83.01%   | 1,902    | 92.60%   | 351         | 17.09%   | 1899              | 92.45%   |
| house    | 2,113           | 1,572        | 74.40%   | 1,890    | 89.45%   | 402         | 19.03%   | 1873              | 88.64%   |
| learn    | 1,575           | 782          | 49.65%   | 1,250    | 79.37%   | 240         | 15.24%   | 991               | 62.92%   |
| left     | 3,801           | 2,318        | 60.98%   | 3,322    | 87.40%   | 457         | 12.02%   | 3313              | 87.16%   |
| marvin   | 2,100           | 1,729        | 82.33%   | 1,810    | 86.19%   | 167         | 7.95%    | 1848              | 88.00%   |
| nine     | 3,934           | 3,217        | 81.77%   | 3,536    | 89.88%   | 964         | 24.50%   | 3519              | 89.45%   |
| no       | 3,941           | 3,368        | 85.46%   | 3,759    | 95.38%   | 1,275       | 32.35%   | 3819              | 96.90%   |
| off      | 3,745           | 1,212        | 32.36%   | 3,066    | 81.87%   | 737         | 19.68%   | 1724              | 46.03%   |
| on       | 3,845           | 1,610        | 41.87%   | 3,385    | 88.04%   | 529         | 13.76%   | 3094              | 80.47%   |
| one      | 3,890           | 2,966        | 76.25%   | 3,566    | 91.67%   | 1,268       | 32.60%   | 3513              | 90.31%   |
| right    | 3,778           | 2,971        | 78.64%   | 3,586    | 94.92%   | 0           | 0.00%    | 3646              | 96.51%   |
| seven    | 3,998           | 3,293        | 82.37%   | 3,670    | 91.80%   | 834         | 20.86%   | 3724              | 93.15%   |
| sheila   | 2,022           | 1,535        | 75.91%   | 1,710    | 84.57%   | 233         | 11.52%   | 1693              | 83.73%   |
| six      | 3,860           | 2,399        | 62.15%   | 3,337    | 86.45%   | 1,052       | 27.25%   | 3581              | 92.77%   |
| stop     | 3,872           | 3,195        | 82.52%   | 3,718    | 96.02%   | 988         | 25.52%   | 3618              | 93.44%   |
| three    | 3,727           | 2,465        | 66.14%   | 3,335    | 89.48%   | 1,277       | 34.26%   | 3467              | 93.02%   |
| tree     | 1,759           | 1,271        | 72.26%   | 1,424    | 80.96%   | 182         | 10.35%   | 1068              | 60.72%   |

---

|        |       |       |        |       |        |       |        |      |        |
|--------|-------|-------|--------|-------|--------|-------|--------|------|--------|
| two    | 3,880 | 2,669 | 68.79% | 3,599 | 92.76% | 2,050 | 52.84% | 3574 | 92.11% |
| up     | 3,723 | 665   | 17.86% | 3,024 | 81.22% | 628   | 16.87% | 2161 | 58.04% |
| visual | 1,592 | 727   | 45.67% | 1,164 | 73.12% | 117   | 7.35%  | 1074 | 67.46% |
| wow    | 2,123 | 1,730 | 81.49% | 1,972 | 92.89% | 365   | 17.19% | 1906 | 89.78% |
| yes    | 4,044 | 3,496 | 86.45% | 3,874 | 95.80% | 1,344 | 33.23% | 3924 | 97.03% |
| zero   | 4,052 | 3,082 | 76.06% | 3,724 | 91.91% | 832   | 20.53% | 3492 | 86.18% |

---

**Supplementary Table S5.** Average word accuracy and standard deviation of proposed system in eight environments.

| SNR<br>(dB)   |   | −20      | −15      | −10      | −5       | 0        | 5        | 10       | 15       | 20       | 25       | 30       | 35       | 40       |
|---------------|---|----------|----------|----------|----------|----------|----------|----------|----------|----------|----------|----------|----------|----------|
| (a) Park      | A | 0.21% ±  | 2.54% ±  | 18.64% ± | 39.84% ± | 53.35% ± | 58.46% ± | 68.53% ± | 76.35% ± | 76.54% ± | 76.64% ± | 76.23% ± | 78.28% ± | 78.09% ± |
|               |   | 0.11%    | 1.35%    | 3.24%    | 2.13%    | 5.65%    | 1.54%    | 3.52%    | 3.64%    | 1.53%    | 5.35%    | 3.53%    | 4.21%    | 3.45%    |
|               | V | 74.54% ± | 74.54% ± | 74.54% ± | 74.54% ± | 74.54% ± | 74.54% ± | 74.54% ± | 74.54% ± | 74.54% ± | 74.54% ± | 74.54% ± | 74.54% ± | 74.54% ± |
|               |   | 1.96%    | 1.96%    | 1.96%    | 1.96%    | 1.96%    | 1.96%    | 1.96%    | 1.96%    | 1.96%    | 1.96%    | 1.96%    | 1.96%    | 1.96%    |
|               | A | 76.34% ± | 78.43% ± | 81.64% ± | 84.95% ± | 86.99% ± | 89.01% ± | 89.53% ± | 90.83% ± | 90.88% ± | 90.89% ± | 90.91% ± | 90.92% ± | 90.94% ± |
|               | V | 0.53%    | 2.35%    | 1.53%    | 5.35%    | 1.74%    | 0.53%    | 2.35%    | 5.74%    | 3.45%    | 2.35%    | 1.53%    | 5.35%    | 1.62%    |
| (b) Hallway   | A | 0.19% ±  | 4.23% ±  | 6.51% ±  | 14.66% ± | 42.43% ± | 56.31% ± | 64.41% ± | 74.52% ± | 84.56% ± | 86.67% ± | 87.45% ± | 87.65% ± | 87.28% ± |
|               |   | 0.11%    | 0.53%    | 2.35%    | 1.53%    | 3.35%    | 4.53%    | 2.34%    | 5.74%    | 3.45%    | 3.52%    | 3.64%    | 4.58%    | 2.23%    |
|               | V | 74.54% ± | 74.54% ± | 74.54% ± | 74.54% ± | 74.54% ± | 74.54% ± | 74.54% ± | 74.54% ± | 74.54% ± | 74.54% ± | 74.54% ± | 74.54% ± | 74.54% ± |
|               |   | 1.96%    | 1.96%    | 1.96%    | 1.96%    | 1.96%    | 1.96%    | 1.96%    | 1.96%    | 1.96%    | 1.96%    | 1.96%    | 1.96%    | 1.96%    |
|               | A | 75.61% ± | 76.89% ± | 79.98% ± | 80.42% ± | 84.53% ± | 88.59% ± | 90.24% ± | 90.58% ± | 90.64% ± | 91.58% ± | 91.65% ± | 91.43% ± | 92.09% ± |
|               | V | 2.35%    | 1.11%    | 5.23%    | 5.31%    | 2.31%    | 1.35%    | 1.53%    | 1.11%    | 5.35%    | 2.53%    | 3.74%    | 3.45%    | 1.18%    |
| (c) Cafeteria | A | 0.14% ±  | 0.24% ±  | 1.95% ±  | 6.14% ±  | 20.53% ± | 24.53% ± | 30.53% ± | 45.02% ± | 53.64% ± | 68.31% ± | 72.54% ± | 74.35% ± | 74.53% ± |
|               |   | 0.12%    | 0.14%    | 1.01%    | 1.53%    | 3.35%    | 4.53%    | 2.34%    | 5.74%    | 3.45%    | 3.52%    | 3.64%    | 2.64%    | 5.14%    |
|               | V | 74.54% ± | 74.54% ± | 74.54% ± | 74.54% ± | 74.54% ± | 74.54% ± | 74.54% ± | 74.54% ± | 74.54% ± | 74.54% ± | 74.54% ± | 74.54% ± | 74.54% ± |
|               |   | 1.96%    | 1.96%    | 1.96%    | 1.96%    | 1.96%    | 1.96%    | 1.96%    | 1.96%    | 1.96%    | 1.96%    | 1.96%    | 1.96%    | 1.96%    |
|               | A | 74.58% ± | 75.59% ± | 77.53% ± | 79.54% ± | 82.57% ± | 84.62% ± | 85.78% ± | 88.82% ± | 88.82% ± | 88.95% ± | 89.76% ± | 89.65% ± | 89.76% ± |
|               | V | 1.53%    | 5.35%    | 1.74%    | 2.35%    | 1.53%    | 5.35%    | 1.74%    | 1.52%    | 1.53%    | 4.35%    | 1.96%    | 3.35%    | 1.74%    |
| (d) Station   | A | 0.17% ±  | 0.23% ±  | 2.54% ±  | 18.43% ± | 34.53% ± | 57.59% ± | 62.64% ± | 79.53% ± | 84.64% ± | 85.35% ± | 87.35% ± | 88.64% ± | 89.37% ± |
|               |   | 0.12%    | 0.18%    | 1.35%    | 3.24%    | 1.11%    | 2.35%    | 2.53%    | 1.89%    | 1.09%    | 3.93%    | 1.95%    | 1.35%    | 2.614%   |
|               | V | 74.54% ± | 74.54% ± | 74.54% ± | 74.54% ± | 74.54% ± | 74.54% ± | 74.54% ± | 74.54% ± | 74.54% ± | 74.54% ± | 74.54% ± | 74.54% ± | 74.54% ± |
|               |   | 1.96%    | 1.96%    | 1.96%    | 1.96%    | 1.96%    | 1.96%    | 1.96%    | 1.96%    | 1.96%    | 1.96%    | 1.96%    | 1.96%    | 1.96%    |
|               | A | 78.54% ± | 82.53% ± | 84.63% ± | 85.53% ± | 86.69% ± | 88.23% ± | 89.01% ± | 89.52% ± | 90.42% ± | 90.35% ± | 93.14% ± | 91.23% ± | 91.12% ± |
|               | V | 0.23%    | 2.42%    | 1.53%    | 1.98%    | 1.25%    | 1.89%    | 2.45%    | 3.86%    | 1.47%    | 3.35%    | 1.51%    | 1.74%    | 1.35%    |
| (e) Cafe      | A | 0.23% ±  | 1.24% ±  | 10.53% ± | 36.92% ± | 48.53% ± | 57.35% ± | 64.53% ± | 78.46% ± | 87.53% ± | 89.35% ± | 89.24% ± | 90.11% ± | 90.12% ± |
|               |   | 0.12%    | 0.95%    | 2.54%    | 1.23%    | 3.97%    | 4.42%    | 2.11%    | 3.35%    | 3.85%    | 3.52%    | 3.17%    | 2.63%    | 3.21%    |
|               | V | 74.54% ± | 74.54% ± | 74.54% ± | 74.54% ± | 74.54% ± | 74.54% ± | 74.54% ± | 74.54% ± | 74.54% ± | 74.54% ± | 74.54% ± | 74.54% ± | 74.54% ± |
|               |   | 1.96%    | 1.96%    | 1.96%    | 1.96%    | 1.96%    | 1.96%    | 1.96%    | 1.96%    | 1.96%    | 1.96%    | 1.96%    | 1.96%    | 1.96%    |
|               | A | 78.53% ± | 81.56% ± | 83.63% ± | 85.01% ± | 88.32% ± | 88.92% ± | 89.12% ± | 89.23% ± | 89.43% ± | 89.95% ± | 90.12% ± | 92.78% ± | 91.34% ± |
|               | V | 0.53%    | 2.35%    | 5.74%    | 1.53%    | 5.35%    | 1.74%    | 3.52%    | 3.64%    | 1.53%    | 5.35%    | 3.53%    | 1.35%    | 3.43%    |

|            |   |          |          |          |          |          |          |          |          |          |          |          |          |          |
|------------|---|----------|----------|----------|----------|----------|----------|----------|----------|----------|----------|----------|----------|----------|
| (f) Square | A | 0.23% ±  | 0.56% ±  | 8.42% ±  | 12.34% ± | 29.52% ± | 53.35% ± | 67.35% ± | 75.83% ± | 85.23% ± | 89.24% ± | 88.53% ± | 89.96% ± | 89.32% ± |
|            |   | 0.22%    | 0.23%    | 1.34%    | 4.25%    | 1.86%    | 3.24%    | 2.52%    | 2.98%    | 3.23%    | 2.06%    | 1.24%    | 3.18%    | 3.45%    |
|            | V | 74.54% ± | 74.54% ± | 74.54% ± | 74.54% ± | 74.54% ± | 74.54% ± | 74.54% ± | 74.54% ± | 74.54% ± | 74.54% ± | 74.54% ± | 74.54% ± | 74.54% ± |
|            |   | 1.96%    | 1.96%    | 1.96%    | 1.96%    | 1.96%    | 1.96%    | 1.96%    | 1.96%    | 1.96%    | 1.96%    | 1.96%    | 1.96%    | 1.96%    |
|            | V | 75.66% ± | 76.73% ± | 79.52% ± | 81.56% ± | 85.34% ± | 89.34% ± | 89.59% ± | 91.32% ± | 91.74% ± | 92.43% ± | 92.42% ± | 92.93% ± | 92.54% ± |
| (g) Car    | A | 1.11%    | 4.25%    | 2.44%    | 2.11%    | 1.53%    | 2.64%    | 3.55%    | 2.78%    | 1.41%    | 4.35%    | 1.53%    | 1.73%    | 2.42%    |
|            |   | 12.42% ± | 20.53% ± | 26.06% ± | 50.34% ± | 62.30% ± | 78.35% ± | 82.54% ± | 82.64% ± | 86.24% ± | 89.46% ± | 92.54% ± | 93.46% ± | 93.68% ± |
|            | V | 1.74%    | 0.53%    | 2.35%    | 1.53%    | 3.35%    | 4.53%    | 2.34%    | 5.74%    | 3.45%    | 3.52%    | 3.64%    | 2.64%    | 2.03%    |
|            |   | 74.54% ± | 74.54% ± | 74.54% ± | 74.54% ± | 74.54% ± | 74.54% ± | 74.54% ± | 74.54% ± | 74.54% ± | 74.54% ± | 74.54% ± | 74.54% ± | 74.54% ± |
|            | V | 1.96%    | 1.96%    | 1.96%    | 1.96%    | 1.96%    | 1.96%    | 1.96%    | 1.96%    | 1.96%    | 1.96%    | 1.96%    | 1.96%    | 1.96%    |
| (h) Living | A | 77.53% ± | 79.36% ± | 81.63% ± | 85.89% ± | 87.35% ± | 88.64% ± | 91.53% ± | 93.64% ± | 93.99% ± | 94.74% ± | 94.89% ± | 94.63% ± | 95.01% ± |
|            |   | 0.53%    | 2.35%    | 1.53%    | 5.35%    | 1.74%    | 0.53%    | 2.35%    | 3.74%    | 3.45%    | 2.35%    | 1.53%    | 3.35%    | 1.18%    |
|            | V | 0.22% ±  | 0.23% ±  | 4.65% ±  | 12.59% ± | 13.25% ± | 14.56% ± | 28.92% ± | 38.71% ± | 41.53% ± | 52.35% ± | 71.54% ± | 75.35% ± | 77.71% ± |
|            |   | 0.14%    | 0.17%    | 1.74%    | 2.44%    | 1.53%    | 4.14%    | 1.74%    | 1.77%    | 1.85%    | 2.35%    | 1.24%    | 3.35%    | 3.94%    |
|            | V | 74.54% ± | 74.54% ± | 74.54% ± | 74.54% ± | 74.54% ± | 74.54% ± | 74.54% ± | 74.54% ± | 74.54% ± | 74.54% ± | 74.54% ± | 74.54% ± | 74.54% ± |
| (h) Living | A | 1.96%    | 1.96%    | 1.96%    | 1.96%    | 1.96%    | 1.96%    | 1.96%    | 1.96%    | 1.96%    | 1.96%    | 1.96%    | 1.96%    | 1.96%    |
|            |   | 74.45% ± | 77.56% ± | 78.89% ± | 80.65% ± | 83.15% ± | 86.45% ± | 87.75% ± | 88.59% ± | 88.68% ± | 89.11% ± | 89.31% ± | 92.13% ± | 89.42% ± |
|            | V | 0.13%    | 1.64%    | 2.03%    | 3.77%    | 1.84%    | 1.57%    | 2.87%    | 3.24%    | 3.02%    | 2.01%    | 1.22%    | 1.35%    | 1.88%    |

**Supplementary Table S6.** Best word accuracy and standard deviation of proposed system in eight environments.

| Category | Park     | Hallway  | Cafeteria | Station  | Cafe     | Square   | Car      | Living   |
|----------|----------|----------|-----------|----------|----------|----------|----------|----------|
| A        | 78.28% ± | 87.65% ± | 74.53% ±  | 89.37% ± | 90.12% ± | 89.96% ± | 93.68% ± | 77.71% ± |
|          | 4.21%    | 4.58%    | 5.14%     | 2.61%    | 3.21%    | 3.18%    | 2.03%    | 3.94%    |
| V        | 74.54% ± | 74.54% ± | 74.54% ±  | 74.54% ± | 74.54% ± | 74.54% ± | 74.54% ± | 74.54% ± |
|          | 1.96%    | 1.96%    | 1.96%     | 1.96%    | 1.96%    | 1.96%    | 1.96%    | 1.96%    |
| AV       | 90.94% ± | 92.09% ± | 89.76% ±  | 93.14% ± | 92.78% ± | 92.93% ± | 95.01% ± | 92.13% ± |
|          | 1.62%    | 1.18%    | 1.96%     | 1.51%    | 1.35%    | 1.73%    | 1.18%    | 1.35%    |
